# Supplementary figures and images for: Induction of Hibernation and Changes in Physiological and Metabolic Indices in Pelodiscus sinensis
Source: MDPI journal article supplement (doi:10.3390/biology12050720), 2023-05-15

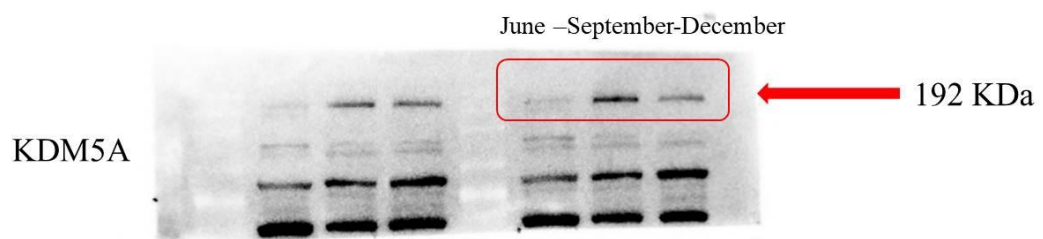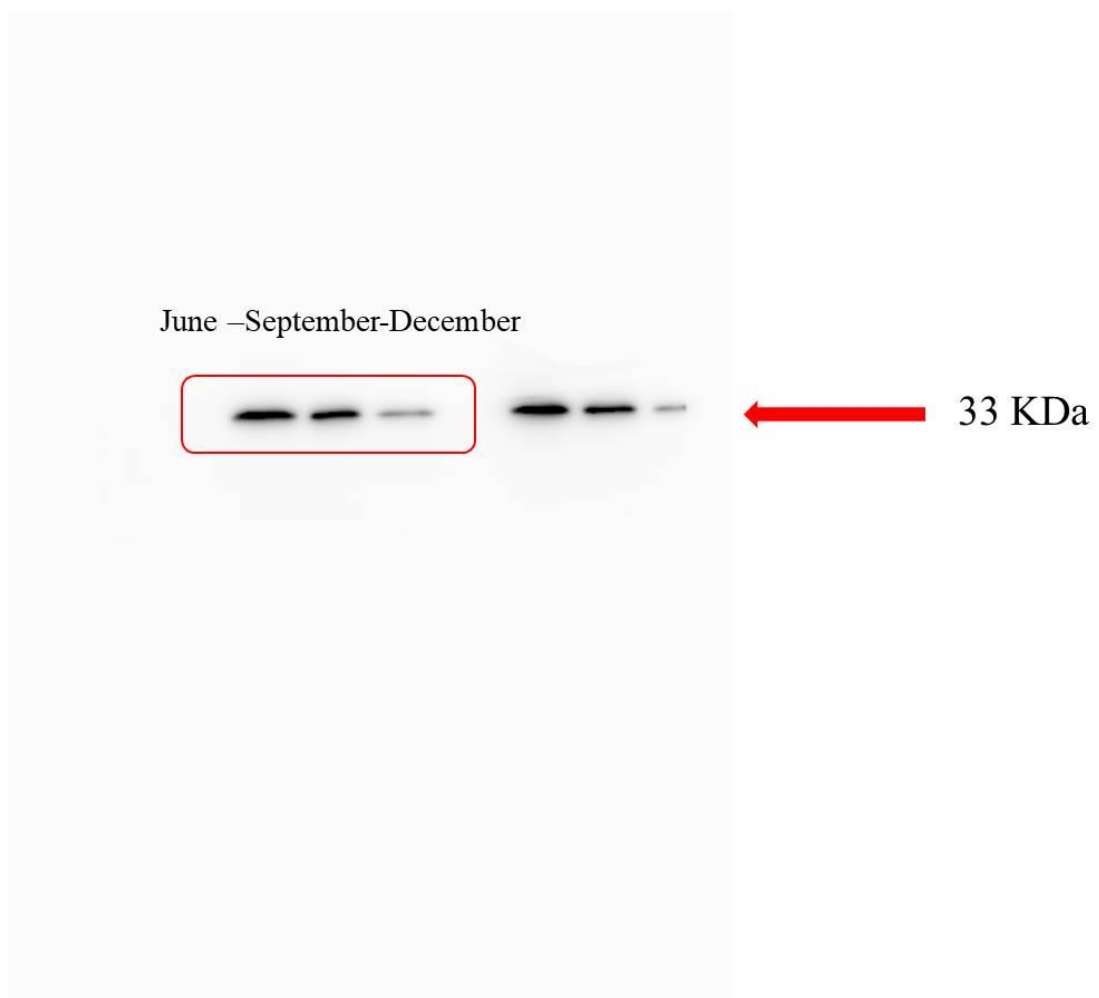

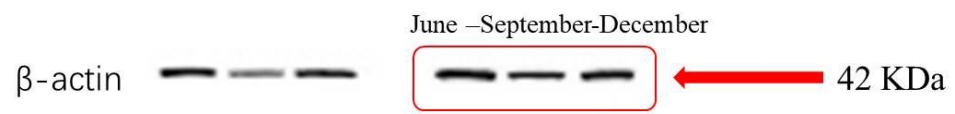

**Figure S1.** Full western blot of ASH2L and KDM5A.

Supplement: s1 [file s1]
